# Supplementary material
Source: PubMed Central journal article supplement (PMC6934203)
Supplement: jci-130-128469-s032.pdf [file jci-130-128469-s032.pdf]

Supplemental Table 1. Antibodies

| Primary Antibodies (Supplier Cat#)                                                                                                                                                                                                                                                                                                                                                                                                                                                                                                                                                                                                                                                                                                                                                                                   | Secondary Antibodies (Supplier Cat#)                                                                                                                                                                                                                                                                                                                                                                                                                                                                                           |
|----------------------------------------------------------------------------------------------------------------------------------------------------------------------------------------------------------------------------------------------------------------------------------------------------------------------------------------------------------------------------------------------------------------------------------------------------------------------------------------------------------------------------------------------------------------------------------------------------------------------------------------------------------------------------------------------------------------------------------------------------------------------------------------------------------------------|--------------------------------------------------------------------------------------------------------------------------------------------------------------------------------------------------------------------------------------------------------------------------------------------------------------------------------------------------------------------------------------------------------------------------------------------------------------------------------------------------------------------------------|
| <p>CD31-Mouse- (Dianova-DIA310)</p> <p>CD31-Human- (Dako GA610)</p> <p>CD4 (BD Pharmingen 550280)</p> <p>CD8a (eBioscience 14-0808-82)</p> <p>CD3 &amp; CD45 (Biolegend 100201 &amp; 103101)</p> <p>Apelin (Santa Cruz sc33469)</p> <p>Mac-2 (Cedarlane: CL8942AP)</p> <p>Ym1 (StemCell: 60130)</p> <p>APJ (Phoenix H-001-79)</p> <p>ESM-1 (MyBiosource MBS2006250)</p> <p>EGFL7 (BIOMATIK CAU21428)</p> <p>F4/80 (Biolegend 123102).</p> <p>CD14 &amp; CD16 (STEMCELL 60004AZ &amp; 60041PE).</p> <p>T-AKT, P-AKT<sup>473</sup>, T-eNOS, P-eNOS<sup>1177</sup> and Actin-b (Cell signalling 4691, 4060, 5880, 9571 and 4970 / 3700)</p> <p>Rabbit Anti-ESM1 polyclonal antibody (Causabio; CSB-PA007825LA01HU)</p> <p>Anti-VE-Cadherin Antibody (Sinobiological 50192-T56)</p> <p>Anti-CD34 Monoclonal Antibody</p> | <p>Biotinylated Goat anti Rat / Rabbit &amp; Mouse IgG (H+L) (Vector Labs BA-9401, BA-1000 &amp; BA-9200 respectively).</p> <p>Goat anti Rat (H+L) Cross-Adsorbed Alexa Fluor 488 (ThermoFisher A-11006).</p> <p>Goat anti Rabbit (H+L) Cross-Adsorbed, Alexa Fluor 568 (ThermoFisher A-11036).</p> <p>Donkey anti-Goat IgG HL Cross-Adsorbed Secondary Antibody Alexa Fluor 568 (ThermoFisher A-11057)</p> <p>Donkey anti-Rat IgG (H+L) Highly Cross-Adsorbed Secondary Antibody, Alexa Fluor 488 (ThermoFisher A-21208).</p> |

(Thermofischer; QBEND/10, MA1-10202)

Anti human Apelin polyclonal antibody (Abcam; ab59469)

Anti-fibrinogen antibody (DAKO; A008002-2)

Supplemental Table 2. Mouse primers for qRT-PCR

|                      |                                                                 |
|----------------------|-----------------------------------------------------------------|
| <b><i>Esm1</i></b>   | F: 5' AGCGAGGAGGATGATTTTGGT 3'<br>R: 5' TGCATTCCATCCCGAAGGT 3'  |
| <b><i>Apln</i></b>   | F: 5' TAGCCCCTGACACTGGTTGTC 3'<br>R: 5' TTCTCCATCCCCCAAAGC 3'   |
| <b><i>Pdgfb</i></b>  | F: 5' CCCTCGGCCTGTGACTAGAA 3'<br>R: 5' AATGGTCACCCGAGCTTGAG 3'  |
| <b><i>Pecam1</i></b> | F: 5' AGGACGATGCGATGGTGTATAA 3'<br>R: 5' AAGACCCGAGCCTGAGGAA 3' |
| <b><i>Tnfa</i></b>   | F: 5' ATGATCCGCGACGTGGAA 3'<br>R: 5' TAGGCACCGCCTGGAGTTC 3'     |
| <b><i>Vegfa</i></b>  | F: 5' GCAGGCTGCTGTAACGATGA 3'<br>R: 5' TCCGCATGATCTGCATGGT 3'   |
| <b><i>Cxcl11</i></b> | F: 5' GGGCCGATGCAAAGACA 3'<br>R: 5' GAGATGAACAGGAAGGTCACAG 3'   |

Supplemental Table 3. Human primers for qRT-PCR

|              |                                                                  |
|--------------|------------------------------------------------------------------|
| <b>APLN</b>  | F: 5' CCCATGCCACATATTGCA 3'<br>R: 5' TCAGTTTGAGGCCACTTGACCTA 3'  |
| <b>PECAM</b> | F: 5' AGTGGAGTCCAGCCGCATAT 3'<br>R: 5' CAGTTCGGGCTTGGAAAATAGT 3' |
| <b>PDGFB</b> | F: 5' AGATCGAGATTGTGCGGAAGA 3'<br>R: 5' GCTGCCACTGTCTCACACTTG 3' |
| <b>GAPDH</b> | F: 5' GATTCCACCCATGGCAAATT 3'<br>R: 5' TGATGGGATTTGCATTGATGAC 3' |
| <b>ESM1</b>  | F: 5' GGTGGACTGCCCTCAACACT 3'<br>R: 5' GTCGTGAGCACTGTCCTCTT 3'   |

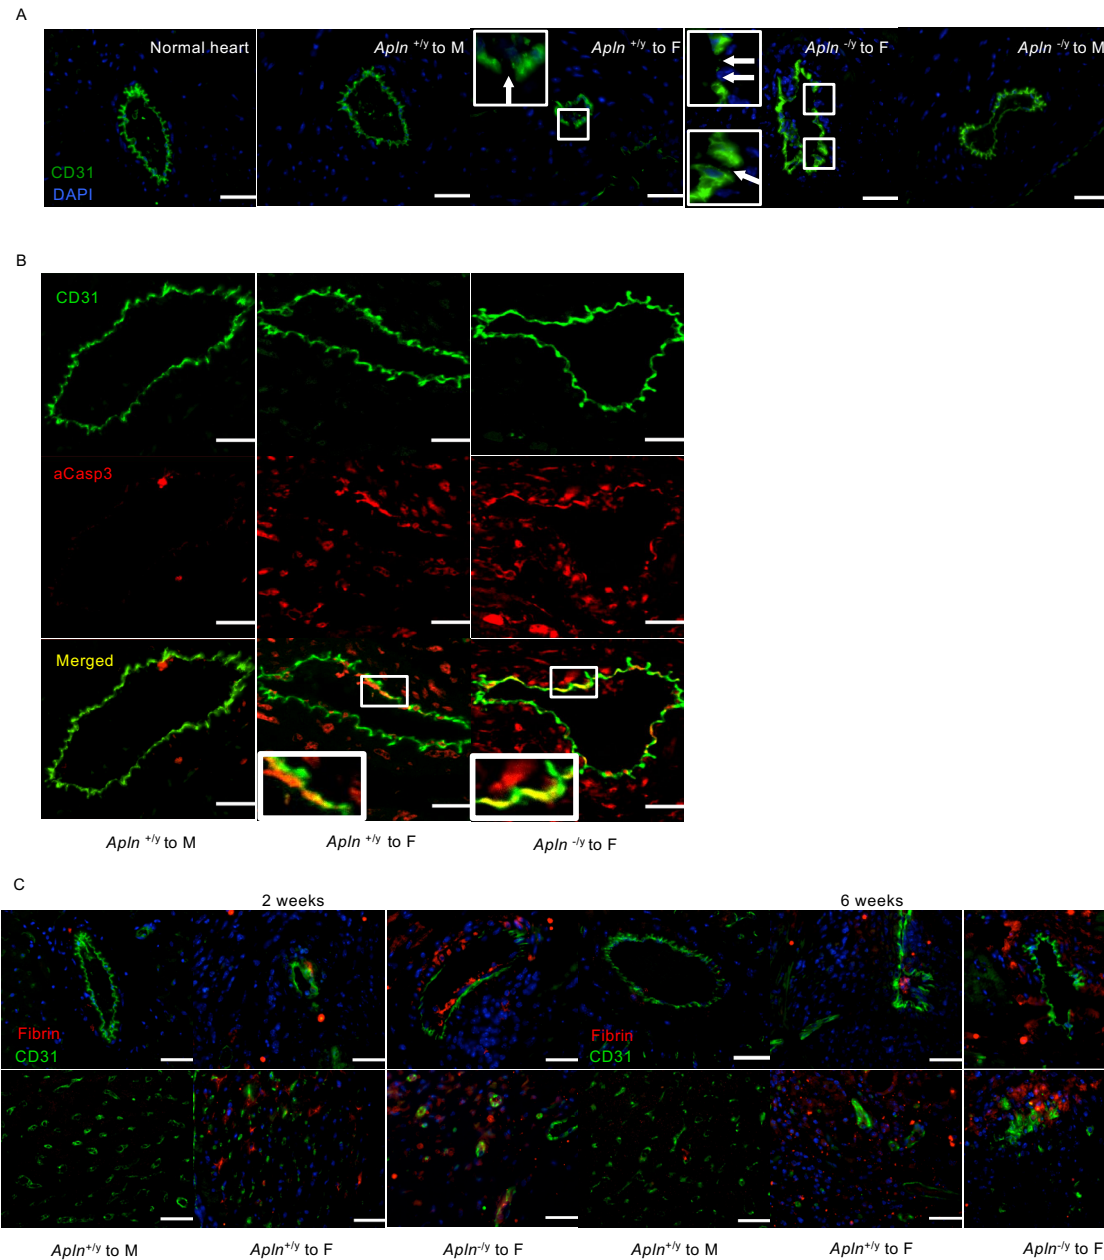

Supplemental Fig 1: Graft coronary arterial injury post-transplantation. A, Loss of continuity of the arterial endothelium in hearts at 2 weeks posttransplantation. Photomicrographs show immunofluorescent staining of the endothelial marker Pecam1 (CD31; green) with DAPI nuclear staining (blue). Arrows indicate areas of endothelial loss / gaps in endothelium (quantitation is in figure 1B). B, Arterial endothelial apoptosis in hearts at 2 weeks post- transplantation. Confocal photomicrographs show double immunofluorescent staining of the endothelial marker Pecam1 (CD31; green) with cleaved caspase 3 (red). Insets show caspase 3+ endothelial cells. Colocalization is quantitated, and is shown in Figure 1B (right panel). C, Fibrin associated with the graft arterial (upper panels) and microvascular (lower panels) endothelium post-transplantation. Photomicrographs show double immunofluorescent staining of the endothelial cell marker Pecam1(CD31; green) and fibrin (red). n=4-15. Scale bar = 50µm.

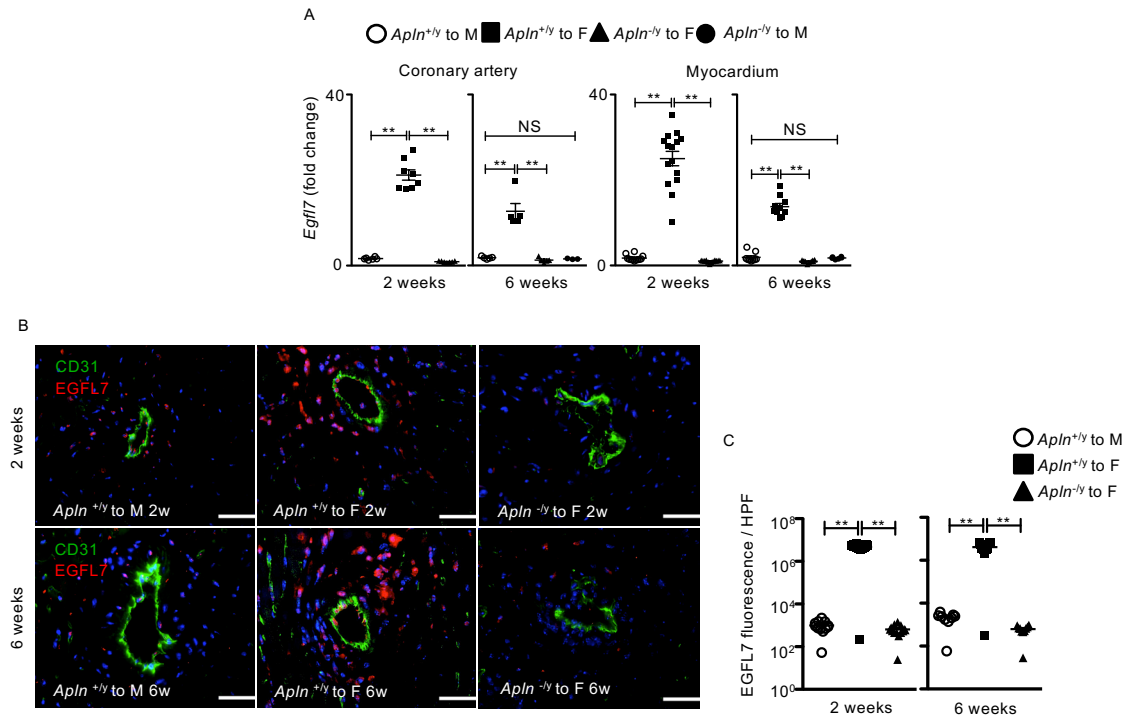

Supplemental figure 2: *Egfl7* gene expression in graft coronary artery or myocardium post-transplantation. A, Consecutive pairs of coronary artery samples were pooled for qRT-PCR analysis (n=3-8 pairs); individual myocardium samples are shown (n=6-15 biological replicates), relative to normal hearts. Samples of heart grafts were obtained at 2 weeks and 6 weeks post-transplant as indicated. Mean  $\pm$  SEM; \*\*P<0.01 and NS=non significant by one way ANOVA with Bonferroni's post-hoc test. B, Double immunofluorescent staining of CD31 (green) and EGFL7 (red) in the heart grafts. C, Quantitation of the total corrected EGFL7 fluorescence/ HPF from (C). n=9-15 biological replicate hearts/ group. Scale bar = 50  $\mu$ m. Mean  $\pm$  SEM; \*\*P<0.01 by one way ANOVA with Bonferroni's post-hoc test.

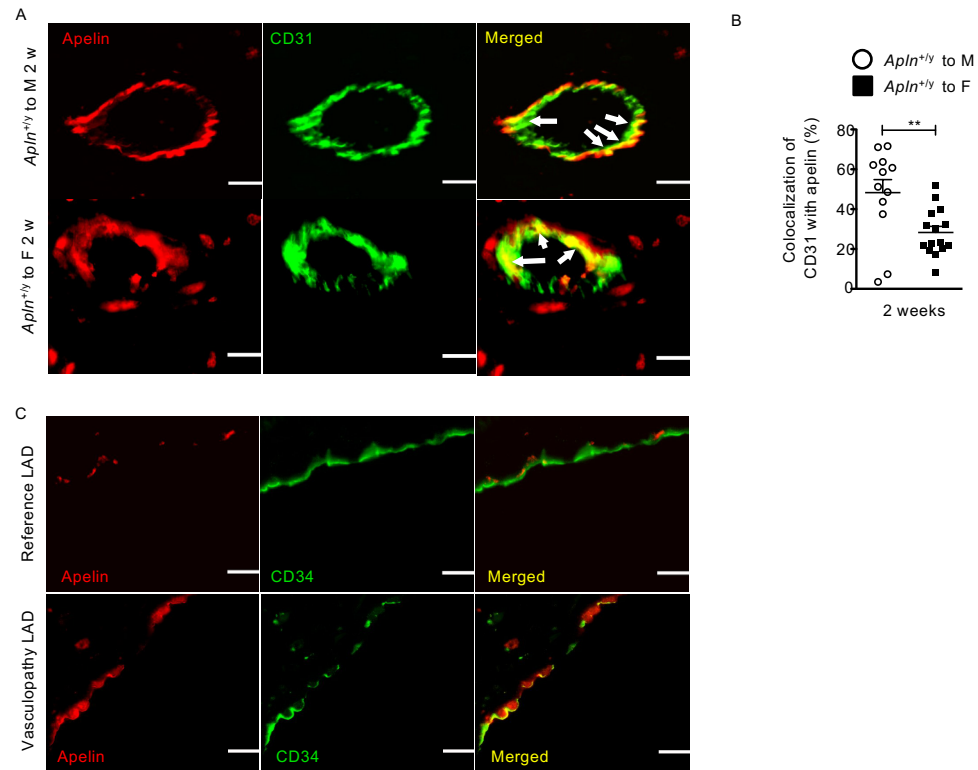

Supplemental figure 3: Apelin expression in heart grafts. A, Confocal photomicrographs show double immunofluorescent staining of apelin (red) and endothelial CD31 (green) in heart grafts at 2 weeks post-transplant (isograft hearts with reperfusion injury are represented in the top panel vs heart allografts with immune and reperfusion injury are in the lower panel). Apelin knockout (*ApIn*<sup>-/-</sup>) heart grafts show no apelin staining. Scale bar = 50  $\mu$ m. B, Quantitation of endothelial cell co-localization with apelin (n=12-15 biological replicate hearts/ group). Mean  $\pm$  SEM; \*\*P<0.01 by Student's t-test. C, Photomicrographs of reference human left anterior descending artery (LAD samples; upper panel) and human LADs with vasculopathy (n=4, lower panel) double immunofluorescence stained for the human endothelial marker CD34 (green) and apelin (red). Scale bar = 50  $\mu$ m.

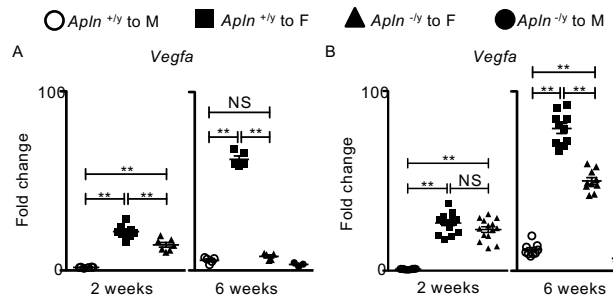

Supplemental figure 4: *Vegfa* expression in mouse heart allografts. A, Isolated coronary arteries (consecutive samples pooled in pairs for analysis (n=3-8 pairs)), and B, myocardium (n=6-15 biological replicates) at 2 and 6 weeks post-transplant, relative to normal hearts. Mean ± SEM; \*\*P<0.01 and NS= non-significant by one way ANOVA with Bonferroni's post-hoc test.



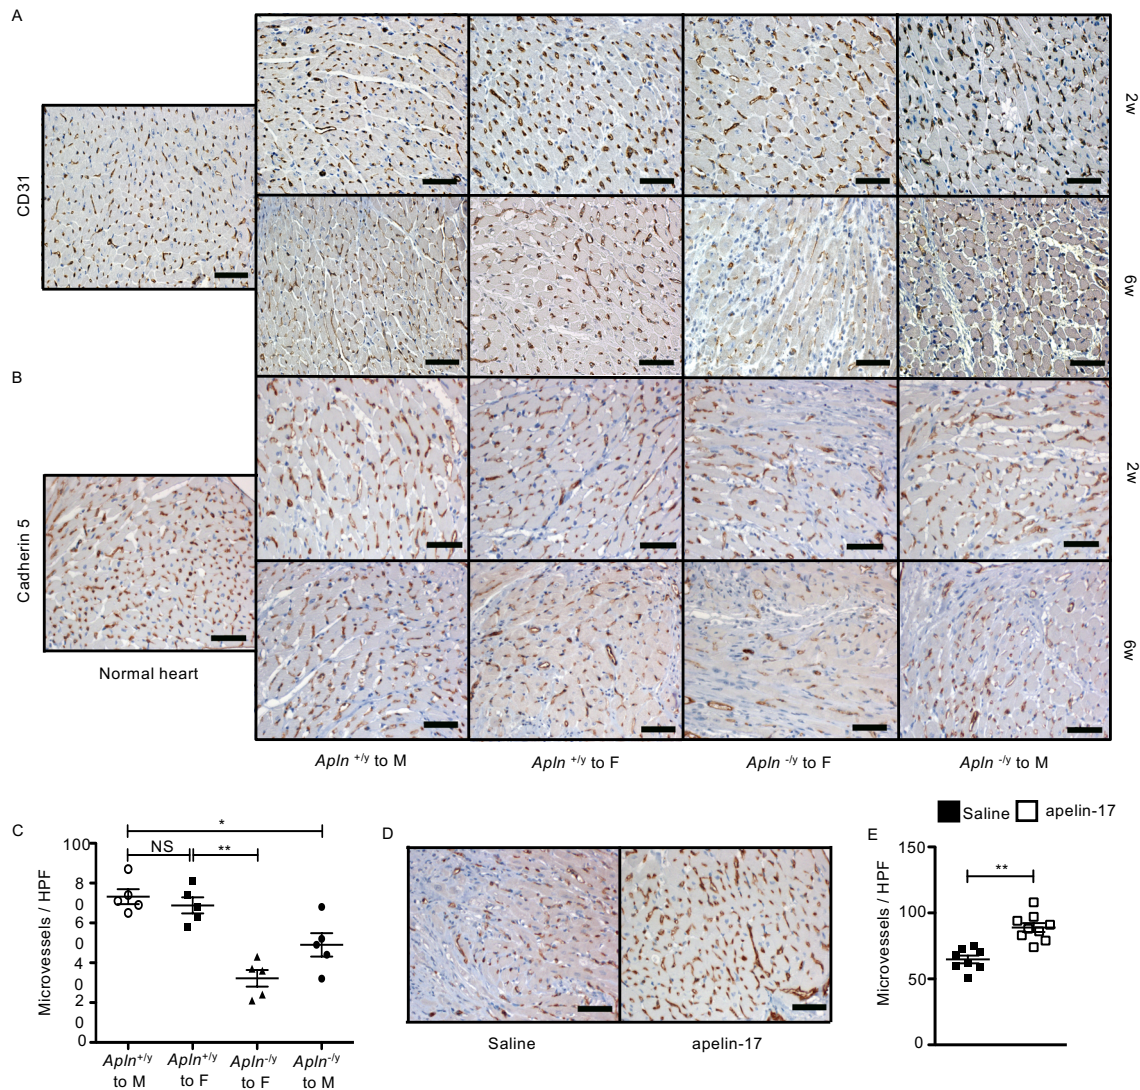

Supplemental figure 5: Microvessel density in mouse heart grafts. Immunohistochemical staining of endothelial marker A, CD31 (brown) or B, VE-Cadherin (brown) among mouse heart grafts at 2 and 6 weeks post-transplant. Quantitation is shown in Figure 1A and Figure 3C. C, Quantitation of VE-Cadherin<sup>+</sup> microvessels at 6 weeks post-transplantation. n=6-10 biological replicate grafts/ group. Scale bar= 50 $\mu$ m. Mean  $\pm$  SEM; NS= non significant, \*\*P<0.01 by one way ANOVA with Bonferroni's post-hoc test. D, Photomicrographs show VE-Cadherin microvessel staining of hearts of allograft recipient mice treated with saline (n=8) or apelin-17-analogue (n=9) from week 2 through week 6 post transplantation. Quantitation of microvessel density is shown in E. \*\*P<0.01 by Mann Whitney.

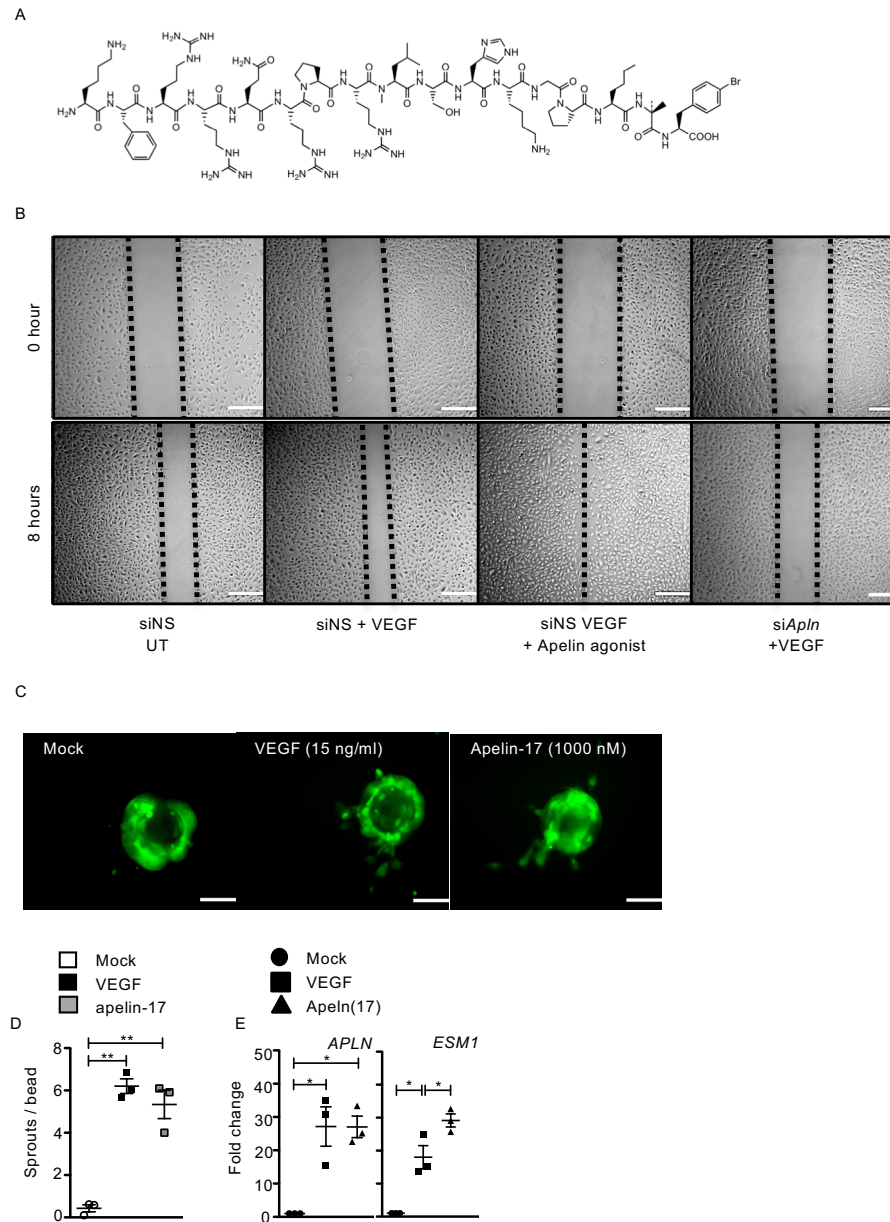

Supplementary figure 6: An apelin-17 analogue promotes closure and tip-cell differentiation in wounded endothelial cell monolayers. **A**, The synthetic N-MeLeu9-apelin-17 (apelin-17) agonist peptide, compound 11 from reference 30. **B**, HUVECs were transfected with non-specific (siNS) or *APLN* siRNA, then plated at confluence. The monolayers were wounded, then treated with VEGF (50 ng/mL) or apelin-17 (1 $\mu$ M). Quantitation of the experiments is shown in Figure 3D.  $n=5$ . Scale bar = 50 $\mu$ m. **C**, Synthetic apelin-17 agonist peptide induces angiogenic sprouting in 3D HUVEC cultures.  $n=3$ . Scale bar = 95 $\mu$ m. **D**, Quantitation of angiogenic sprouting in mock-, VEGF- (15 ng/ml), or apelin-17- (1 $\mu$ M) stimulated cultures. **E**, Tip cell gene expression in cultures from (D).  $n=3$  biological replicates. Mean  $\pm$  SEM; \*  $p<0.05$ , \*\*  $p<0.01$  by one way ANOVA with Bonferroni's post-hoc test.



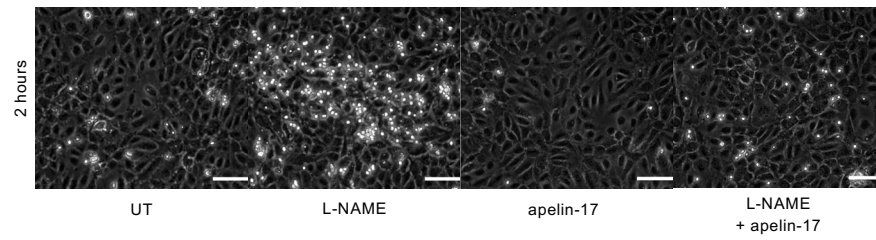

Supplemental figure 8: apelin-17 inhibits monocyte adhesion to endothelial cell monolayers. Human umbilical vein endothelial cells were pretreated with TNF $\alpha$  (100 ng/mL) for 18 hours, then primary human monocytes were added to the co-culture for 2 hours in the presence of apelin-17 with or without the nitric oxide synthase inhibitor N $\omega$ -Nitro-L-arginine methyl ester hydrochloride (L-NAME), as indicated. The (phase-bright) monocytes adherent after gentle washes were photographed. The quantitation is shown in Figure 5D. Representative of n=5 biological replicates. Scale bar = 50  $\mu$ m.

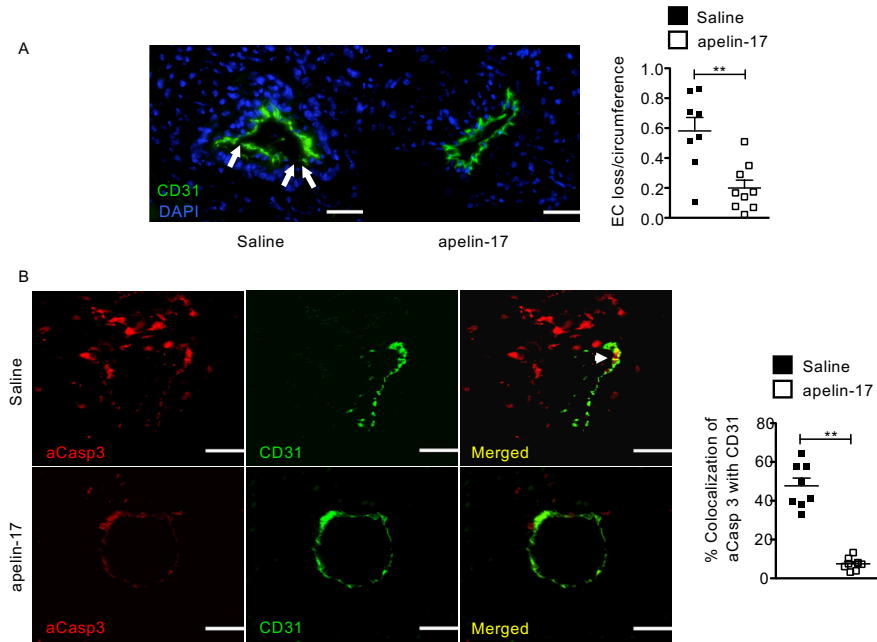

Supplemental figure 9. apelin-17 reduces endothelial cell loss and apoptosis. A, Photomicrographs show immunofluorescent staining of endothelial cell CD31 (green) in heart allografts from mice treated with either saline (n=8) or apelin-17 (n=9) from week 2 through week 6 post-transplantation. Quantitation of arterial endothelial gaps (right panel). B, Confocal photomicrographs show immunofluorescent staining for cleaved caspase 3 (red) and endothelial cell CD31 (green; left panel). Quantitation of the cleaved caspase 3<sup>+</sup> co-localization with CD31<sup>+</sup> ECs by Mander's coefficient analysis (right panel). n=8-9 mice. Scale bar = 50  $\mu$ m. Mean  $\pm$  SEM; \*\*P<0.01 Mann Whitney.

donor APLN KO male splenocytes HY tetramer IFN 2

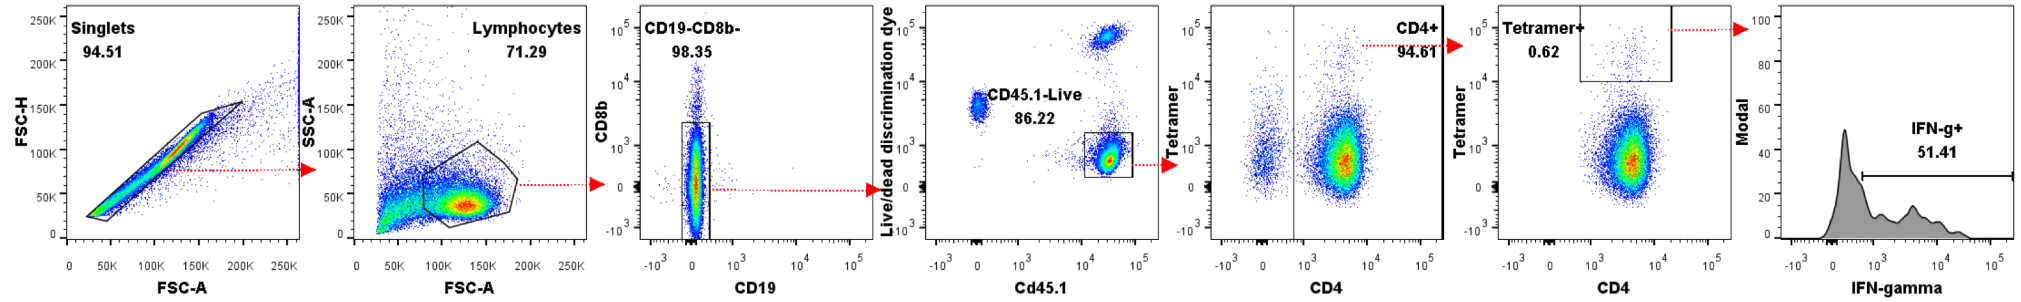

donor WT male splenocytes HY tetramer IFN

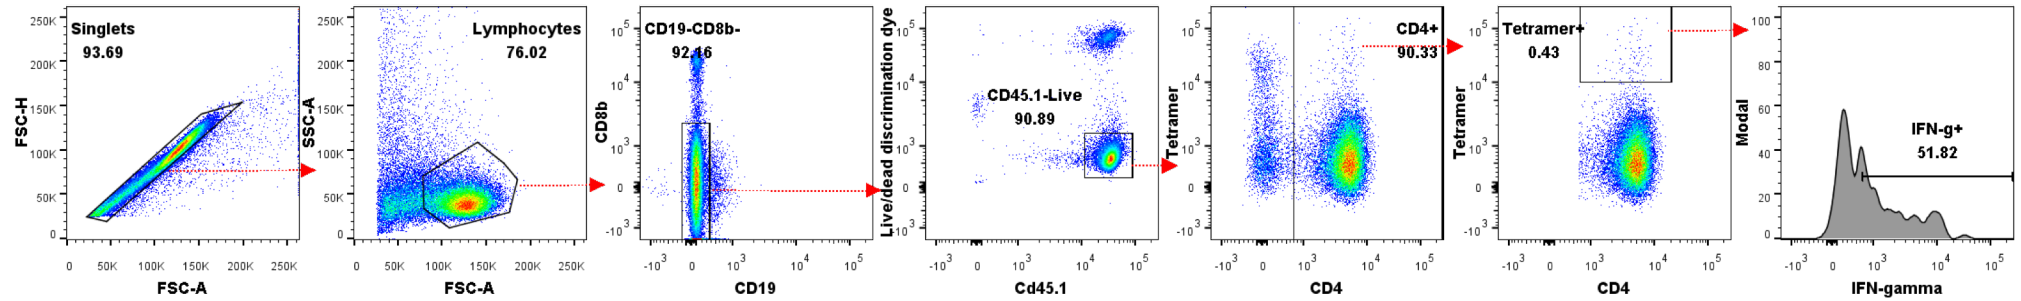

Marilyn PD1 KO splenocytes HY tetramer IFN

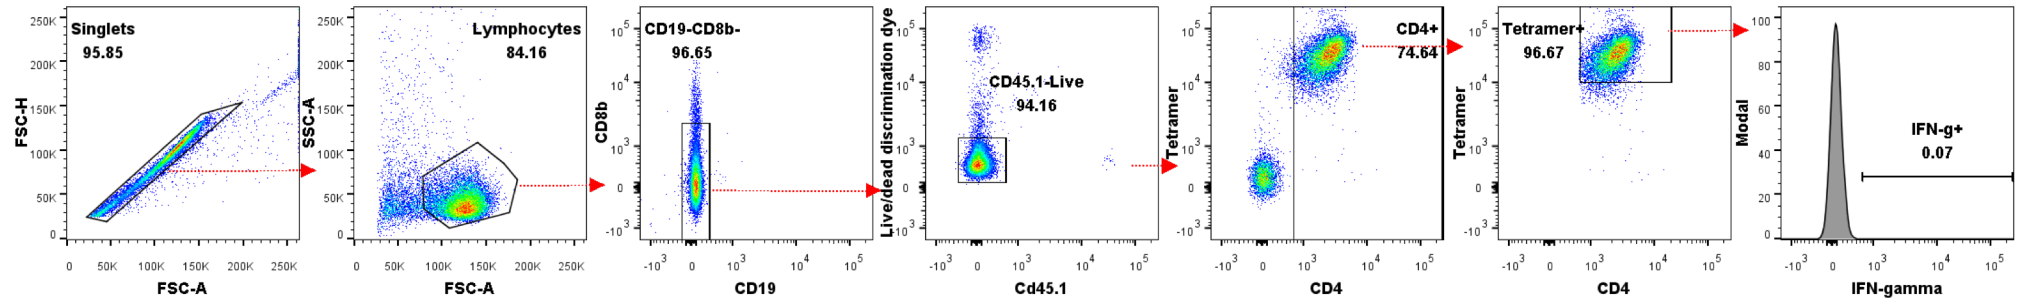

Pooled splenocytes Ctrl tetramer Isotype

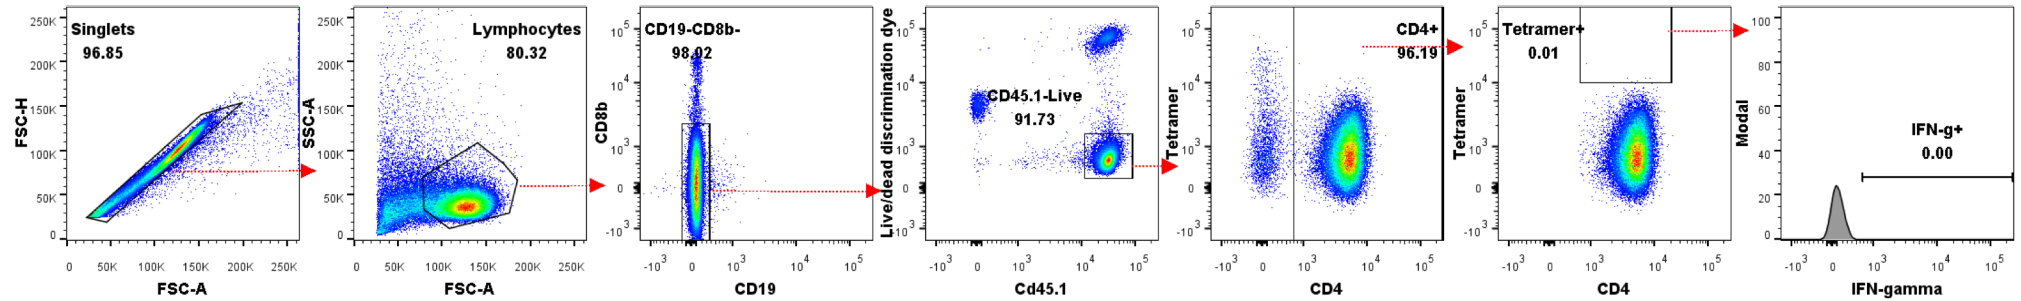

Supplementary figure 10: Gating strategy for male antigen specific CD4 T cells: A depiction showing the gating strategy used to identify live CD19-CD8β- CD45.1<sup>+</sup>(host) IFN-γ<sup>+</sup> HY-I-A<sup>b</sup> CD4<sup>+</sup> cells from the spleens of the *Apln*<sup>-/-</sup> (1st row) or *Apln*<sup>+/-</sup> (2nd row) heart grafted mice, 2 weeks post-transplantation. Splenocytes from female Marilyn-*Rag2*<sup>-/-</sup>-*pd1*<sup>-/-</sup> mice were used as a positive control cells (3rd row). Isotype control of anti-mouse IFN-γ antibodies (4th row) were used to exclude non-specific binding from the staining (n=4-7 biological replicates). The same gating strategy is used for determining the frequencies of CD44<sup>hi</sup> cells.
